# Supplementary material for: A data-driven and DFT assisted theoretic guide for membrane design in flow batteries
Source: Royal Society of Chemistry journal article supplement (doi:10.1039/d1ta02421c), 2021-01-01
Supplement: d1ta02421c1.pdf [file d1ta02421c1.pdf]

**Dataset 1.** Dataset for building the machine learning model (Training + Testing)

| Experiment label | Sample label | w% | Solvent Name | Boiling Point /°C | Melting point /°C | Dielectric constant | Dipole moment /( $10^{-30}$ C · m) | Viscosity /( $\text{mPa} \cdot \text{s}$ ) | Surface tension /( $\text{mN} \cdot \text{m}^{-1}$ ) | Heat of evaporation /( $\text{kJ} \cdot \text{mol}^{-1}$ ) | Heat capacity /( $\text{kJ} \cdot (\text{kg} \cdot \text{K})^{-1}$ ) | Density /( $\text{g} \cdot \text{ml}^{-1}$ ) | Soaking time /minutes | Volatilization temperature /°C | Volatilization time /h | Current Density /( $\text{mA} \cdot \text{cm}^{-2}$ ) | CE /% | VE /% | EE /% |
|------------------|--------------|----|--------------|-------------------|-------------------|---------------------|------------------------------------|--------------------------------------------|------------------------------------------------------|------------------------------------------------------------|----------------------------------------------------------------------|----------------------------------------------|-----------------------|--------------------------------|------------------------|-------------------------------------------------------|-------|-------|-------|
| 1                | sample 1     | 13 | IPA          | 82.4              | -89.5             | 18.3                | 5.60                               | 2.43                                       | 21.70                                                | 40.06                                                      | 2.55                                                                 | 0.7863                                       | 30                    | 25                             | 2                      | 80                                                    | 94.70 | 92.29 | 87.41 |
|                  | sample 2     | 13 | IPA          | 82.4              | -89.5             | 18.3                | 5.60                               | 2.43                                       | 21.70                                                | 40.06                                                      | 2.55                                                                 | 0.7863                                       | 30                    | 25                             | 2                      | 80                                                    | 95.86 | 91.98 | 88.18 |
| 2                | sample 1     | 13 | IPA          | 82.4              | -89.5             | 18.3                | 5.60                               | 2.43                                       | 21.70                                                | 40.06                                                      | 2.55                                                                 | 0.7863                                       | 30                    | 25                             | 12                     | 80                                                    | 95.40 | 91.77 | 87.55 |
|                  | sample 2     | 13 | IPA          | 82.4              | -89.5             | 18.3                | 5.60                               | 2.43                                       | 21.70                                                | 40.06                                                      | 2.55                                                                 | 0.7863                                       | 30                    | 25                             | 12                     | 80                                                    | 95.69 | 91.56 | 87.62 |
| 3                | sample 1     | 13 | IPA          | 82.4              | -89.5             | 18.3                | 5.60                               | 2.43                                       | 21.70                                                | 40.06                                                      | 2.55                                                                 | 0.7863                                       | 30                    | 25                             | 24                     | 80                                                    | 96.66 | 92.15 | 89.07 |
|                  | sample 2     | 13 | IPA          | 82.4              | -89.5             | 18.3                | 5.60                               | 2.43                                       | 21.70                                                | 40.06                                                      | 2.55                                                                 | 0.7863                                       | 30                    | 25                             | 24                     | 80                                                    | 96.41 | 92.41 | 89.09 |
| 4                | sample 1     | 13 | IPA          | 82.4              | -89.5             | 18.3                | 5.60                               | 2.43                                       | 21.70                                                | 40.06                                                      | 2.55                                                                 | 0.7863                                       | 30                    | 50                             | 1                      | 80                                                    | 97.35 | 91.15 | 88.74 |
|                  | sample 2     | 13 | IPA          | 82.4              | -89.5             | 18.3                | 5.60                               | 2.43                                       | 21.70                                                | 40.06                                                      | 2.55                                                                 | 0.7863                                       | 30                    | 50                             | 1                      | 80                                                    | 96.88 | 92.12 | 89.25 |
| 5                | sample 1     | 13 | IPA          | 82.4              | -89.5             | 18.3                | 5.60                               | 2.43                                       | 21.70                                                | 40.06                                                      | 2.55                                                                 | 0.7863                                       | 30                    | 50                             | 2                      | 80                                                    | 97.06 | 91.33 | 88.64 |
|                  | sample 2     | 13 | IPA          | 82.4              | -89.5             | 18.3                | 5.60                               | 2.43                                       | 21.70                                                | 40.06                                                      | 2.55                                                                 | 0.7863                                       | 30                    | 50                             | 2                      | 80                                                    | 97.61 | 90.98 | 88.81 |
| 6                | sample 1     | 13 | IPA          | 82.4              | -89.5             | 18.3                | 5.60                               | 2.43                                       | 21.70                                                | 40.06                                                      | 2.55                                                                 | 0.7863                                       | 30                    | 80                             | 1                      | 80                                                    | 96.85 | 91.12 | 88.25 |
|                  | sample 2     | 13 | IPA          | 82.4              | -89.5             | 18.3                | 5.60                               | 2.43                                       | 21.70                                                | 40.06                                                      | 2.55                                                                 | 0.7863                                       | 30                    | 80                             | 1                      | 80                                                    | 96.62 | 91.77 | 88.67 |
| 7                | sample 1     | 13 | IPA          | 82.4              | -89.5             | 18.3                | 5.60                               | 2.43                                       | 21.70                                                | 40.06                                                      | 2.55                                                                 | 0.7863                                       | 30                    | 120                            | 0.5                    | 80                                                    | 97.29 | 91.27 | 88.80 |
|                  | sample 2     | 13 | IPA          | 82.4              | -89.5             | 18.3                | 5.60                               | 2.43                                       | 21.70                                                | 40.06                                                      | 2.55                                                                 | 0.7863                                       | 30                    | 120                            | 0.5                    | 80                                                    | 97.07 | 92.70 | 89.98 |
| 8                | sample 1     | 13 | water        | 100.0             | 0.0               | 78.5                | 6.18                               | 1.01                                       | 72.75                                                | 40.67                                                      | 4.19                                                                 | 1.0000                                       | 30                    | 25                             | 2                      | 80                                                    | 96.50 | 90.61 | 87.43 |
|                  | sample 2     | 13 | water        | 100.0             | 0.0               | 78.5                | 6.18                               | 1.01                                       | 72.75                                                | 40.67                                                      | 4.19                                                                 | 1.0000                                       | 30                    | 25                             | 2                      | 80                                                    | 95.22 | 90.71 | 86.38 |
| 9                | sample 1     | 13 | water        | 100.0             | 0.0               | 78.5                | 6.18                               | 1.01                                       | 72.75                                                | 40.67                                                      | 4.19                                                                 | 1.0000                                       | 30                    | 25                             | 12                     | 80                                                    | 97.48 | 90.49 | 88.22 |
|                  | sample 2     | 13 | water        | 100.0             | 0.0               | 78.5                | 6.18                               | 1.01                                       | 72.75                                                | 40.67                                                      | 4.19                                                                 | 1.0000                                       | 30                    | 25                             | 12                     | 80                                                    | 98.12 | 91.17 | 89.46 |
| 10               | sample 1     | 13 | water        | 100.0             | 0.0               | 78.5                | 6.18                               | 1.01                                       | 72.75                                                | 40.67                                                      | 4.19                                                                 | 1.0000                                       | 30                    | 25                             | 24                     | 80                                                    | 97.83 | 91.15 | 89.16 |
|                  | sample 2     | 13 | water        | 100.0             | 0.0               | 78.5                | 6.18                               | 1.01                                       | 72.75                                                | 40.67                                                      | 4.19                                                                 | 1.0000                                       | 30                    | 25                             | 24                     | 80                                                    | 97.17 | 91.64 | 89.05 |
| 11               | sample 1     | 13 | water        | 100.0             | 0.0               | 78.5                | 6.18                               | 1.01                                       | 72.75                                                | 40.67                                                      | 4.19                                                                 | 1.0000                                       | 30                    | 50                             | 1                      | 80                                                    | 97.62 | 90.80 | 88.64 |
|                  | sample 2     | 13 | water        | 100.0             | 0.0               | 78.5                | 6.18                               | 1.01                                       | 72.75                                                | 40.67                                                      | 4.19                                                                 | 1.0000                                       | 30                    | 50                             | 1                      | 80                                                    | 97.79 | 89.69 | 87.71 |
| 12               | sample 1     | 13 | water        | 100.0             | 0.0               | 78.5                | 6.18                               | 1.01                                       | 72.75                                                | 40.67                                                      | 4.19                                                                 | 1.0000                                       | 30                    | 50                             | 2                      | 80                                                    | 98.48 | 89.43 | 88.07 |
|                  | sample 2     | 13 | water        | 100.0             | 0.0               | 78.5                | 6.18                               | 1.01                                       | 72.75                                                | 40.67                                                      | 4.19                                                                 | 1.0000                                       | 30                    | 50                             | 2                      | 80                                                    | 98.90 | 88.79 | 87.81 |
| 13               | sample 1     | 13 | water        | 100.0             | 0.0               | 78.5                | 6.18                               | 1.01                                       | 72.75                                                | 40.67                                                      | 4.19                                                                 | 1.0000                                       | 30                    | 80                             | 0.5                    | 80                                                    | 95.47 | 91.43 | 87.29 |
|                  | sample 2     | 13 | water        | 100.0             | 0.0               | 78.5                | 6.18                               | 1.01                                       | 72.75                                                | 40.67                                                      | 4.19                                                                 | 1.0000                                       | 30                    | 80                             | 0.5                    | 80                                                    | 97.43 | 90.33 | 88.01 |
| 14               | sample 1     | 13 | water        | 100.0             | 0.0               | 78.5                | 6.18                               | 1.01                                       | 72.75                                                | 40.67                                                      | 4.19                                                                 | 1.0000                                       | 30                    | 80                             | 1                      | 80                                                    | 98.95 | 89.04 | 88.10 |
|                  | sample 2     | 13 | water        | 100.0             | 0.0               | 78.5                | 6.18                               | 1.01                                       | 72.75                                                | 40.67                                                      | 4.19                                                                 | 1.0000                                       | 30                    | 80                             | 1                      | 80                                                    | 98.51 | 89.44 | 88.10 |
| 15               | sample 1     | 13 | IPA          | 82.4              | -89.5             | 18.3                | 5.60                               | 2.43                                       | 21.70                                                | 40.06                                                      | 2.55                                                                 | 0.7863                                       | 5                     | 50                             | 2                      | 80                                                    | 98.00 | 90.90 | 89.08 |
|                  | sample 2     | 13 | IPA          | 82.4              | -89.5             | 18.3                | 5.60                               | 2.43                                       | 21.70                                                | 40.06                                                      | 2.55                                                                 | 0.7863                                       | 5                     | 50                             | 2                      | 80                                                    | 97.88 | 91.89 | 89.94 |
| 16               | sample 1     | 13 | IPA          | 82.4              | -89.5             | 18.3                | 5.60                               | 2.43                                       | 21.70                                                | 40.06                                                      | 2.55                                                                 | 0.7863                                       | 10                    | 50                             | 2                      | 80                                                    | 95.88 | 91.78 | 88.00 |
|                  | sample 2     | 13 | IPA          | 82.4              | -89.5             | 18.3                | 5.60                               | 2.43                                       | 21.70                                                | 40.06                                                      | 2.55                                                                 | 0.7863                                       | 10                    | 50                             | 2                      | 80                                                    | 95.63 | 92.09 | 88.07 |
| 17               | sample 1     | 13 | IPA          | 82.4              | -89.5             | 18.3                | 5.60                               | 2.43                                       | 21.70                                                | 40.06                                                      | 2.55                                                                 | 0.7863                                       | 20                    | 50                             | 2                      | 80                                                    | 96.09 | 91.55 | 87.97 |
|                  | sample 2     | 13 | IPA          | 82.4              | -89.5             | 18.3                | 5.60                               | 2.43                                       | 21.70                                                | 40.06                                                      | 2.55                                                                 | 0.7863                                       | 20                    | 50                             | 2                      | 80                                                    | 95.20 | 92.33 | 87.90 |
| 18               | sample 1     | 13 | IPA          | 82.4              | -89.5             | 18.3                | 5.60                               | 2.43                                       | 21.70                                                | 40.06                                                      | 2.55                                                                 | 0.7863                                       | 30                    | 50                             | 2                      | 80                                                    | 96.22 | 92.29 | 88.80 |
|                  | sample 2     | 13 | IPA          | 82.4              | -89.5             | 18.3                | 5.60                               | 2.43                                       | 21.70                                                | 40.06                                                      | 2.55                                                                 | 0.7863                                       | 30                    | 50                             | 2                      | 80                                                    | 96.68 | 91.33 | 88.30 |
| 19               | sample 1     | 15 | IPA          | 82.4              | -89.5             | 18.3                | 5.60                               | 2.43                                       | 21.70                                                | 40.06                                                      | 2.55                                                                 | 0.7863                                       | 30                    | 25                             | 24                     | 40                                                    | 96.53 | 95.89 | 92.57 |
|                  | sample 2     | 15 | IPA          | 82.4              | -89.5             | 18.3                | 5.60                               | 2.43                                       | 21.70                                                | 40.06                                                      | 2.55                                                                 | 0.7863                                       | 30                    | 25                             | 24                     | 40                                                    | 97.39 | 95.97 | 93.47 |
| 20               | sample 1     | 15 | IPA          | 82.4              | -89.5             | 18.3                | 5.60                               | 2.43                                       | 21.70                                                | 40.06                                                      | 2.55                                                                 | 0.7863                                       | 30                    | 25                             | 24                     | 60                                                    | 97.73 | 93.83 | 91.70 |
|                  | sample 2     | 15 | IPA          | 82.4              | -89.5             | 18.3                | 5.60                               | 2.43                                       | 21.70                                                | 40.06                                                      | 2.55                                                                 | 0.7863                                       | 30                    | 25                             | 24                     | 60                                                    | 98.31 | 94.04 | 92.45 |
| 21               | sample 1     | 15 | IPA          | 82.4              | -89.5             | 18.3                | 5.60                               | 2.43                                       | 21.70                                                | 40.06                                                      | 2.55                                                                 | 0.7863                                       | 30                    | 25                             | 24                     | 80                                                    | 98.25 | 91.84 | 90.23 |
|                  | sample 2     | 15 | IPA          | 82.4              | -89.5             | 18.3                | 5.60                               | 2.43                                       | 21.70                                                | 40.06                                                      | 2.55                                                                 | 0.7863                                       | 30                    | 25                             | 24                     | 80                                                    | 98.60 | 92.17 | 90.88 |
| 22               | sample 1     | 15 | IPA          | 82.4              | -89.5             | 18.3                | 5.60                               | 2.43                                       | 21.70                                                | 40.06                                                      | 2.55                                                                 | 0.7863                                       | 30                    | 25                             | 24                     | 100                                                   | 98.68 | 89.92 | 88.74 |

| Data lable |          | w% | Solvent Name | Boiling Point /°C | Melting point /°C | Dielectric constant | Dipole moment /( $10^{-30}$ C · m) | Viscosity /( $\text{mPa s}$ ) | Surface tension /( $\text{mN m}^{-1}$ ) | Heat of evaporation /( $\text{kJ mol}^{-1}$ ) | Heat capacity /( $\text{kJ}/(\text{kg} \cdot \text{K})$ ) | Density /( $\text{g ml}^{-1}$ ) | Soaking time /minutes | Volatilization temperature /°C | Volatilization time /h | Current Density /( $\text{mA cm}^{-2}$ ) | CE /% | VE /% | EE /% |
|------------|----------|----|--------------|-------------------|-------------------|---------------------|------------------------------------|-------------------------------|-----------------------------------------|-----------------------------------------------|-----------------------------------------------------------|---------------------------------|-----------------------|--------------------------------|------------------------|------------------------------------------|-------|-------|-------|
| 22         | sample 2 | 15 | IPA          | 82.4              | -89.5             | 18.3                | 5.60                               | 2.43                          | 21.70                                   | 40.06                                         | 2.55                                                      | 0.7863                          | 30                    | 25                             | 24                     | 100                                      | 98.87 | 90.37 | 89.34 |
| 23         | sample 1 | 15 | IPA          | 82.4              | -89.5             | 18.3                | 5.60                               | 2.43                          | 21.70                                   | 40.06                                         | 2.55                                                      | 0.7863                          | 30                    | 25                             | 24                     | 120                                      | 98.88 | 88.42 | 87.43 |
|            | sample 2 | 15 | IPA          | 82.4              | -89.5             | 18.3                | 5.60                               | 2.43                          | 21.70                                   | 40.06                                         | 2.55                                                      | 0.7863                          | 30                    | 25                             | 24                     | 120                                      | 99.04 | 88.63 | 87.78 |
| 24         | sample 1 | 15 | IPA          | 82.4              | -89.5             | 18.3                | 5.60                               | 2.43                          | 21.70                                   | 40.06                                         | 2.55                                                      | 0.7863                          | 30                    | 25                             | 24                     | 140                                      | 99.06 | 86.72 | 85.90 |
|            | sample 2 | 15 | IPA          | 82.4              | -89.5             | 18.3                | 5.60                               | 2.43                          | 21.70                                   | 40.06                                         | 2.55                                                      | 0.7863                          | 30                    | 25                             | 24                     | 140                                      | 99.27 | 87.06 | 86.43 |
| 25         | sample 1 | 15 | IPA          | 82.4              | -89.5             | 18.3                | 5.60                               | 2.43                          | 21.70                                   | 40.06                                         | 2.55                                                      | 0.7863                          | 30                    | 25                             | 24                     | 160                                      | 98.81 | 84.86 | 83.86 |
|            | sample 2 | 15 | IPA          | 82.4              | -89.5             | 18.3                | 5.60                               | 2.43                          | 21.70                                   | 40.06                                         | 2.55                                                      | 0.7863                          | 30                    | 25                             | 24                     | 160                                      | 99.14 | 85.48 | 84.74 |
| 26         | sample 1 | 15 | IPA          | 82.4              | -89.5             | 18.3                | 5.60                               | 2.43                          | 21.70                                   | 40.06                                         | 2.55                                                      | 0.7863                          | 30                    | 25                             | 24                     | 200                                      | 99.19 | 81.44 | 80.78 |
|            | sample 2 | 15 | IPA          | 82.4              | -89.5             | 18.3                | 5.60                               | 2.43                          | 21.70                                   | 40.06                                         | 2.55                                                      | 0.7863                          | 30                    | 25                             | 24                     | 200                                      | 99.29 | 82.51 | 81.93 |
| 27         | sample 1 | 15 | IPA          | 82.4              | -89.5             | 18.3                | 5.60                               | 2.43                          | 21.70                                   | 40.06                                         | 2.55                                                      | 0.7863                          | 30                    | 25                             | 1                      | 80                                       | 97.74 | 90.96 | 88.90 |
|            | sample 2 | 15 | IPA          | 82.4              | -89.5             | 18.3                | 5.60                               | 2.43                          | 21.70                                   | 40.06                                         | 2.55                                                      | 0.7863                          | 30                    | 25                             | 1                      | 80                                       | 98.27 | 90.68 | 89.11 |
| 28         | sample 1 | 15 | IPA          | 82.4              | -89.5             | 18.3                | 5.60                               | 2.43                          | 21.70                                   | 40.06                                         | 2.55                                                      | 0.7863                          | 30                    | 25                             | 2                      | 80                                       | 97.26 | 92.15 | 89.62 |
|            | sample 2 | 15 | IPA          | 82.4              | -89.5             | 18.3                | 5.60                               | 2.43                          | 21.70                                   | 40.06                                         | 2.55                                                      | 0.7863                          | 30                    | 25                             | 2                      | 80                                       | 98.06 | 91.68 | 89.91 |
| 29         | sample 1 | 15 | IPA          | 82.4              | -89.5             | 18.3                | 5.60                               | 2.43                          | 21.70                                   | 40.06                                         | 2.55                                                      | 0.7863                          | 30                    | 25                             | 12                     | 80                                       | 97.50 | 90.99 | 88.71 |
|            | sample 2 | 15 | IPA          | 82.4              | -89.5             | 18.3                | 5.60                               | 2.43                          | 21.70                                   | 40.06                                         | 2.55                                                      | 0.7863                          | 30                    | 25                             | 12                     | 80                                       | 96.11 | 91.12 | 87.58 |
| 30         | sample 1 | 15 | IPA          | 82.4              | -89.5             | 18.3                | 5.60                               | 2.43                          | 21.70                                   | 40.06                                         | 2.55                                                      | 0.7863                          | 30                    | 25                             | 24                     | 80                                       | 98.73 | 91.74 | 90.57 |
|            | sample 2 | 15 | IPA          | 82.4              | -89.5             | 18.3                | 5.60                               | 2.43                          | 21.70                                   | 40.06                                         | 2.55                                                      | 0.7863                          | 30                    | 25                             | 24                     | 80                                       | 98.28 | 91.39 | 89.82 |
| 31         | sample 1 | 15 | hexane       | 68.7              | -95.3             | 1.89                | 0.27                               | 0.31                          | 17.90                                   | 33.12                                         | 2.28                                                      | 0.6590                          | 30                    | 25                             | 12                     | 80                                       | 96.14 | 89.56 | 86.10 |
|            | sample 2 | 15 | hexane       | 68.7              | -95.3             | 1.89                | 0.27                               | 0.31                          | 17.90                                   | 33.12                                         | 2.28                                                      | 0.6590                          | 30                    | 25                             | 12                     | 80                                       | 96.80 | 90.61 | 87.70 |
| 32         | sample 1 | 15 | hexane       | 68.7              | -95.3             | 1.89                | 0.27                               | 0.31                          | 17.90                                   | 33.12                                         | 2.28                                                      | 0.6590                          | 30                    | 25                             | 24                     | 80                                       | 98.20 | 89.41 | 87.80 |
|            | sample 2 | 15 | hexane       | 68.7              | -95.3             | 1.89                | 0.27                               | 0.31                          | 17.90                                   | 33.12                                         | 2.28                                                      | 0.6590                          | 30                    | 25                             | 24                     | 80                                       | 98.54 | 88.99 | 87.69 |
| 33         | sample 1 | 15 | ethanol      | 78.3              | -114.5            | 25.7                | 5.60                               | 1.06                          | 22.10                                   | 38.59                                         | 2.42                                                      | 0.7893                          | 30                    | 25                             | 0.5                    | 80                                       | 97.09 | 92.27 | 89.59 |
|            | sample 2 | 15 | ethanol      | 78.3              | -114.5            | 25.7                | 5.60                               | 1.06                          | 22.10                                   | 38.59                                         | 2.42                                                      | 0.7893                          | 30                    | 25                             | 0.5                    | 80                                       | 98.60 | 91.75 | 90.47 |
| 34         | sample 1 | 15 | ethanol      | 78.3              | -114.5            | 25.7                | 5.60                               | 1.06                          | 22.10                                   | 38.59                                         | 2.42                                                      | 0.7893                          | 30                    | 25                             | 1                      | 80                                       | 98.83 | 91.57 | 90.49 |
|            | sample 2 | 15 | ethanol      | 78.3              | -114.5            | 25.7                | 5.60                               | 1.06                          | 22.10                                   | 38.59                                         | 2.42                                                      | 0.7893                          | 30                    | 25                             | 1                      | 80                                       | 98.35 | 90.50 | 89.01 |
| 35         | sample 1 | 15 | ethanol      | 78.3              | -114.5            | 25.7                | 5.60                               | 1.06                          | 22.10                                   | 38.59                                         | 2.42                                                      | 0.7893                          | 30                    | 25                             | 2                      | 80                                       | 97.76 | 91.69 | 89.64 |
|            | sample 2 | 15 | ethanol      | 78.3              | -114.5            | 25.7                | 5.60                               | 1.06                          | 22.10                                   | 38.59                                         | 2.42                                                      | 0.7893                          | 30                    | 25                             | 2                      | 80                                       | 98.98 | 90.41 | 89.49 |
| 36         | sample 1 | 15 | ethanol      | 78.3              | -114.5            | 25.7                | 5.60                               | 1.06                          | 22.10                                   | 38.59                                         | 2.42                                                      | 0.7893                          | 30                    | 25                             | 12                     | 80                                       | 98.03 | 91.39 | 89.59 |
|            | sample 2 | 15 | ethanol      | 78.3              | -114.5            | 25.7                | 5.60                               | 1.06                          | 22.10                                   | 38.59                                         | 2.42                                                      | 0.7893                          | 30                    | 25                             | 12                     | 80                                       | 97.27 | 91.02 | 88.53 |
| 37         | sample 1 | 15 | ethanol      | 78.3              | -114.5            | 25.7                | 5.60                               | 1.06                          | 22.10                                   | 38.59                                         | 2.42                                                      | 0.7893                          | 30                    | 25                             | 24                     | 80                                       | 98.29 | 91.78 | 90.21 |
|            | sample 2 | 15 | ethanol      | 78.3              | -114.5            | 25.7                | 5.60                               | 1.06                          | 22.10                                   | 38.59                                         | 2.42                                                      | 0.7893                          | 30                    | 25                             | 24                     | 80                                       | 97.91 | 90.69 | 88.80 |
| 38         | sample 1 | 15 | water        | 100.0             | 0.0               | 78.5                | 6.18                               | 1.01                          | 72.75                                   | 40.67                                         | 4.19                                                      | 1.0000                          | 30                    | 25                             | 2                      | 80                                       | 95.60 | 90.72 | 86.73 |
|            | sample 2 | 15 | water        | 100.0             | 0.0               | 78.5                | 6.18                               | 1.01                          | 72.75                                   | 40.67                                         | 4.19                                                      | 1.0000                          | 30                    | 25                             | 2                      | 80                                       | 96.83 | 90.19 | 87.34 |
| 39         | sample 1 | 15 | water        | 100.0             | 0.0               | 78.5                | 6.18                               | 1.01                          | 72.75                                   | 40.67                                         | 4.19                                                      | 1.0000                          | 30                    | 25                             | 12                     | 80                                       | 98.90 | 90.31 | 89.31 |
|            | sample 2 | 15 | water        | 100.0             | 0.0               | 78.5                | 6.18                               | 1.01                          | 72.75                                   | 40.67                                         | 4.19                                                      | 1.0000                          | 30                    | 25                             | 12                     | 80                                       | 98.59 | 90.48 | 89.21 |
| 40         | sample 1 | 15 | water        | 100.0             | 0.0               | 78.5                | 6.18                               | 1.01                          | 72.75                                   | 40.67                                         | 4.19                                                      | 1.0000                          | 30                    | 25                             | 24                     | 80                                       | 98.64 | 90.25 | 89.02 |
|            | sample 2 | 15 | water        | 100.0             | 0.0               | 78.5                | 6.18                               | 1.01                          | 72.75                                   | 40.67                                         | 4.19                                                      | 1.0000                          | 30                    | 25                             | 24                     | 80                                       | 98.64 | 90.25 | 89.02 |
| 41         | sample 1 | 15 | acetone      | 56.1              | -94.7             | 20.7                | 8.97                               | 0.32                          | 23.70                                   | 29.11                                         | 1.28                                                      | 0.7906                          | 30                    | 25                             | 0.5                    | 80                                       | 94.55 | 91.05 | 86.09 |
|            | sample 2 | 15 | acetone      | 56.1              | -94.7             | 20.7                | 8.97                               | 0.32                          | 23.70                                   | 29.11                                         | 1.28                                                      | 0.7906                          | 30                    | 25                             | 0.5                    | 80                                       | 94.68 | 90.24 | 85.44 |
| 42         | sample 1 | 15 | acetone      | 56.1              | -94.7             | 20.7                | 8.97                               | 0.32                          | 23.70                                   | 29.11                                         | 1.28                                                      | 0.7906                          | 30                    | 25                             | 1                      | 80                                       | 98.95 | 89.74 | 88.80 |
|            | sample 2 | 15 | acetone      | 56.1              | -94.7             | 20.7                | 8.97                               | 0.32                          | 23.70                                   | 29.11                                         | 1.28                                                      | 0.7906                          | 30                    | 25                             | 1                      | 80                                       | 99.18 | 88.59 | 87.87 |
| 43         | sample 1 | 15 | acetone      | 56.1              | -94.7             | 20.7                | 8.97                               | 0.32                          | 23.70                                   | 29.11                                         | 1.28                                                      | 0.7906                          | 30                    | 25                             | 2                      | 80                                       | 98.53 | 90.13 | 88.81 |
|            | sample 2 | 15 | acetone      | 56.1              | -94.7             | 20.7                | 8.97                               | 0.32                          | 23.70                                   | 29.11                                         | 1.28                                                      | 0.7906                          | 30                    | 25                             | 2                      | 80                                       | 99.00 | 88.42 | 87.54 |
| 44         | sample 1 | 15 | acetone      | 56.1              | -94.7             | 20.7                | 8.97                               | 0.32                          | 23.70                                   | 29.11                                         | 1.28                                                      | 0.7906                          | 30                    | 25                             | 12                     | 80                                       | 98.53 | 90.19 | 88.87 |

| Data label |          | w% | Solvent Name | Boiling Point /°C | Melting point /°C | Dielectric constant | Dipole moment /( $10^{-30}$ C · m) | Viscosity /( $\text{mPa s}$ ) | Surface tension /( $\text{mN m}^{-1}$ ) | Heat of evaporation /( $\text{kJ mol}^{-1}$ ) | Heat capacity /( $\text{kJ}/(\text{kg} \cdot \text{K})$ ) | Density /( $\text{g ml}^{-1}$ ) | Soaking time /minutes | Volatilization temperature /°C | Volatilization time /h | Current Density /( $\text{mA cm}^{-2}$ ) | CE /% | VE /% | EE /% |
|------------|----------|----|--------------|-------------------|-------------------|---------------------|------------------------------------|-------------------------------|-----------------------------------------|-----------------------------------------------|-----------------------------------------------------------|---------------------------------|-----------------------|--------------------------------|------------------------|------------------------------------------|-------|-------|-------|
| 44         | sample 2 | 15 | acetone      | 56.1              | -94.7             | 20.7                | 8.97                               | 0.32                          | 23.70                                   | 29.11                                         | 1.28                                                      | 0.7906                          | 30                    | 25                             | 12                     | 80                                       | 99.08 | 89.46 | 88.64 |
| 45         | sample 1 | 15 | acetone      | 56.1              | -94.7             | 20.7                | 8.97                               | 0.32                          | 23.70                                   | 29.11                                         | 1.28                                                      | 0.7906                          | 30                    | 25                             | 24                     | 80                                       | 99.17 | 89.42 | 88.68 |
|            | sample 2 | 15 | acetone      | 56.1              | -94.7             | 20.7                | 8.97                               | 0.32                          | 23.70                                   | 29.11                                         | 1.28                                                      | 0.7906                          | 30                    | 25                             | 24                     | 80                                       | 98.95 | 88.57 | 87.64 |
| 46         | sample 1 | 17 | IPA          | 82.4              | -89.5             | 18.3                | 5.60                               | 2.43                          | 21.70                                   | 40.06                                         | 2.55                                                      | 0.7863                          | 30                    | 25                             | 0.5                    | 80                                       | 94.30 | 92.43 | 87.16 |
|            | sample 2 | 17 | IPA          | 82.4              | -89.5             | 18.3                | 5.60                               | 2.43                          | 21.70                                   | 40.06                                         | 2.55                                                      | 0.7863                          | 30                    | 25                             | 0.5                    | 80                                       | 95.88 | 92.06 | 88.27 |
| 47         | sample 1 | 17 | IPA          | 82.4              | -89.5             | 18.3                | 5.60                               | 2.43                          | 21.70                                   | 40.06                                         | 2.55                                                      | 0.7863                          | 30                    | 25                             | 2                      | 80                                       | 94.69 | 91.86 | 86.99 |
|            | sample 2 | 17 | IPA          | 82.4              | -89.5             | 18.3                | 5.60                               | 2.43                          | 21.70                                   | 40.06                                         | 2.55                                                      | 0.7863                          | 30                    | 25                             | 2                      | 80                                       | 94.65 | 92.25 | 87.31 |
| 48         | sample 1 | 17 | IPA          | 82.4              | -89.5             | 18.3                | 5.60                               | 2.43                          | 21.70                                   | 40.06                                         | 2.55                                                      | 0.7863                          | 30                    | 25                             | 12                     | 80                                       | 96.53 | 90.81 | 87.67 |
|            | sample 2 | 17 | IPA          | 82.4              | -89.5             | 18.3                | 5.60                               | 2.43                          | 21.70                                   | 40.06                                         | 2.55                                                      | 0.7863                          | 30                    | 25                             | 12                     | 80                                       | 98.40 | 91.70 | 90.23 |
| 49         | sample 1 | 17 | IPA          | 82.4              | -89.5             | 18.3                | 5.60                               | 2.43                          | 21.70                                   | 40.06                                         | 2.55                                                      | 0.7863                          | 30                    | 25                             | 24                     | 80                                       | 98.28 | 91.60 | 90.03 |
|            | sample 2 | 17 | IPA          | 82.4              | -89.5             | 18.3                | 5.60                               | 2.43                          | 21.70                                   | 40.06                                         | 2.55                                                      | 0.7863                          | 30                    | 25                             | 24                     | 80                                       | 97.55 | 91.44 | 89.20 |
