# Supplementary material for: A data-driven and DFT assisted theoretic guide for membrane design in flow batteries
Source: Royal Society of Chemistry journal article supplement (doi:10.1039/d1ta02421c), 2021-01-01
Supplement: d1ta02421c2.pdf [file d1ta02421c2.pdf]

**Dataset 2.** Dataset for screening solvents

| w% | Solvent Name    | Boiling Point /°C | Melting point /°C | Dielectric constant | Dipole moment /( $10^{-30}$ C · m) | Viscosity /(mPa s) | Surface tension /(mN m <sup>-1</sup> ) | Heat of evaporation /(kJ mol <sup>-1</sup> ) | Heat capacity /[kJ/(kg · K)] | Density /(g ml <sup>-1</sup> ) | Soaking time /minutes | Volatilization temperature /°C | Volatilization time /h | Current Density /(mA cm <sup>-2</sup> ) | Pred. CE /% | Pred. VE /% | Pred. EE /% |
|----|-----------------|-------------------|-------------------|---------------------|------------------------------------|--------------------|----------------------------------------|----------------------------------------------|------------------------------|--------------------------------|-----------------------|--------------------------------|------------------------|-----------------------------------------|-------------|-------------|-------------|
| 15 | methanol        | 64.5              | -97.5             | 31.2                | 5.55                               | 0.59               | 22.55                                  | 35.32                                        | 2.51                         | 0.7913                         | 30                    | 25                             | 24                     | 80                                      | 98.88       | 90.46       | 89.45       |
| 15 | n-propanol      | 97.2              | -126.2            | 22.2                | 5.53                               | 2.26               | 23.80                                  | 40.91                                        | 2.45                         | 0.8036                         | 30                    | 25                             | 24                     | 80                                      | 98.62       | 92.71       | 91.43       |
| 15 | n-butanol       | 117.7             | -89.8             | 17.1                | 5.60                               | 2.95               | 24.60                                  | 43.86                                        | 2.33                         | 0.8097                         | 30                    | 25                             | 24                     | 80                                      | 98.23       | 93.27       | 91.62       |
| 15 | IPA             | 107.9             | -108.0            | 17.95               | 5.97                               | 4.00               | 23.00                                  | 42.56                                        | 2.39                         | 0.8020                         | 30                    | 25                             | 24                     | 80                                      | 97.90       | 93.44       | 91.47       |
| 15 | n-Pentanol      | 138.0             | -78.2             | 13.9                | 6.00                               | 3.31               | 25.60                                  | 44.51                                        | 2.98                         | 0.8144                         | 30                    | 25                             | 24                     | 80                                      | 98.13       | 93.72       | 91.96       |
| 15 | ethanol         | 78.3              | -114.5            | 25.7                | 5.60                               | 1.06               | 22.10                                  | 38.59                                        | 2.42                         | 0.7893                         | 30                    | 25                             | 24                     | 40                                      | 98.48       | 94.93       | 93.49       |
| 15 | ethanol         | 78.3              | -114.5            | 25.7                | 5.60                               | 1.06               | 22.10                                  | 38.59                                        | 2.42                         | 0.7893                         | 30                    | 25                             | 24                     | 50                                      | 98.59       | 94.09       | 92.77       |
| 15 | ethanol         | 78.3              | -114.5            | 25.7                | 5.60                               | 1.06               | 22.10                                  | 38.59                                        | 2.42                         | 0.7893                         | 30                    | 25                             | 24                     | 60                                      | 98.70       | 93.26       | 92.04       |
| 15 | ethanol         | 78.3              | -114.5            | 25.7                | 5.60                               | 1.06               | 22.10                                  | 38.59                                        | 2.42                         | 0.7893                         | 30                    | 25                             | 24                     | 70                                      | 98.81       | 92.42       | 91.32       |
| 15 | ethanol         | 78.3              | -114.5            | 25.7                | 5.60                               | 1.06               | 22.10                                  | 38.59                                        | 2.42                         | 0.7893                         | 30                    | 25                             | 24                     | 80                                      | 98.92       | 91.59       | 90.60       |
| 15 | ethanol         | 78.3              | -114.5            | 25.7                | 5.60                               | 1.06               | 22.10                                  | 38.59                                        | 2.42                         | 0.7893                         | 30                    | 25                             | 24                     | 90                                      | 99.03       | 90.76       | 89.88       |
| 15 | ethanol         | 78.3              | -114.5            | 25.7                | 5.60                               | 1.06               | 22.10                                  | 38.59                                        | 2.42                         | 0.7893                         | 30                    | 25                             | 24                     | 100                                     | 99.15       | 89.92       | 89.15       |
| 15 | ethanol         | 78.3              | -114.5            | 25.7                | 5.60                               | 1.06               | 22.10                                  | 38.59                                        | 2.42                         | 0.7893                         | 30                    | 25                             | 24                     | 110                                     | 99.26       | 89.09       | 88.43       |
| 15 | ethanol         | 78.3              | -114.5            | 25.7                | 5.60                               | 1.06               | 22.10                                  | 38.59                                        | 2.42                         | 0.7893                         | 30                    | 25                             | 24                     | 120                                     | 99.38       | 88.25       | 87.71       |
| 15 | ethanol         | 78.3              | -114.5            | 25.7                | 5.60                               | 1.06               | 22.10                                  | 38.59                                        | 2.42                         | 0.7893                         | 30                    | 25                             | 24                     | 130                                     | 99.51       | 87.42       | 86.99       |
| 15 | ethanol         | 78.3              | -114.5            | 25.7                | 5.60                               | 1.06               | 22.10                                  | 38.59                                        | 2.42                         | 0.7893                         | 30                    | 25                             | 24                     | 140                                     | 99.63       | 86.58       | 86.27       |
| 15 | ethanol         | 78.3              | -114.5            | 25.7                | 5.60                               | 1.06               | 22.10                                  | 38.59                                        | 2.42                         | 0.7893                         | 30                    | 25                             | 24                     | 150                                     | 99.76       | 85.75       | 85.54       |
| 15 | ethanol         | 78.3              | -114.5            | 25.7                | 5.60                               | 1.06               | 22.10                                  | 38.59                                        | 2.42                         | 0.7893                         | 30                    | 25                             | 24                     | 160                                     | 99.89       | 84.92       | 84.82       |
| 15 | ethanol         | 78.3              | -114.5            | 25.7                | 5.60                               | 1.06               | 22.10                                  | 38.59                                        | 2.42                         | 0.7893                         | 30                    | 25                             | 24                     | 170                                     | 100.02      | 84.08       | 84.10       |
| 15 | ethanol         | 78.3              | -114.5            | 25.7                | 5.60                               | 1.06               | 22.10                                  | 38.59                                        | 2.42                         | 0.7893                         | 30                    | 25                             | 24                     | 180                                     | 100.16      | 83.25       | 83.38       |
| 15 | ethanol         | 78.3              | -114.5            | 25.7                | 5.60                               | 1.06               | 22.10                                  | 38.59                                        | 2.42                         | 0.7893                         | 30                    | 25                             | 24                     | 190                                     | 100.29      | 82.41       | 82.65       |
| 15 | ethanol         | 78.3              | -114.5            | 25.7                | 5.60                               | 1.06               | 22.10                                  | 38.59                                        | 2.42                         | 0.7893                         | 30                    | 25                             | 24                     | 200                                     | 100.43      | 81.58       | 81.93       |
| 15 | IPA             | 82.4              | -89.5             | 18.3                | 5.60                               | 2.43               | 21.70                                  | 40.06                                        | 2.55                         | 0.7863                         | 30                    | 25                             | 24                     | 40                                      | 97.78       | 95.27       | 93.15       |
| 15 | IPA             | 82.4              | -89.5             | 18.3                | 5.60                               | 2.43               | 21.70                                  | 40.06                                        | 2.55                         | 0.7863                         | 30                    | 25                             | 24                     | 50                                      | 97.88       | 94.43       | 92.43       |
| 15 | IPA             | 82.4              | -89.5             | 18.3                | 5.60                               | 2.43               | 21.70                                  | 40.06                                        | 2.55                         | 0.7863                         | 30                    | 25                             | 24                     | 60                                      | 97.98       | 93.60       | 91.71       |
| 15 | IPA             | 82.4              | -89.5             | 18.3                | 5.60                               | 2.43               | 21.70                                  | 40.06                                        | 2.55                         | 0.7863                         | 30                    | 25                             | 24                     | 70                                      | 98.08       | 92.76       | 90.99       |
| 15 | IPA             | 82.4              | -89.5             | 18.3                | 5.60                               | 2.43               | 21.70                                  | 40.06                                        | 2.55                         | 0.7863                         | 30                    | 25                             | 24                     | 80                                      | 98.19       | 91.93       | 90.26       |
| 15 | IPA             | 82.4              | -89.5             | 18.3                | 5.60                               | 2.43               | 21.70                                  | 40.06                                        | 2.55                         | 0.7863                         | 30                    | 25                             | 24                     | 90                                      | 98.29       | 91.09       | 89.54       |
| 15 | IPA             | 82.4              | -89.5             | 18.3                | 5.60                               | 2.43               | 21.70                                  | 40.06                                        | 2.55                         | 0.7863                         | 30                    | 25                             | 24                     | 100                                     | 98.40       | 90.26       | 88.82       |
| 15 | IPA             | 82.4              | -89.5             | 18.3                | 5.60                               | 2.43               | 21.70                                  | 40.06                                        | 2.55                         | 0.7863                         | 30                    | 25                             | 24                     | 110                                     | 98.51       | 89.43       | 88.10       |
| 15 | IPA             | 82.4              | -89.5             | 18.3                | 5.60                               | 2.43               | 21.70                                  | 40.06                                        | 2.55                         | 0.7863                         | 30                    | 25                             | 24                     | 120                                     | 98.63       | 88.59       | 87.37       |
| 15 | IPA             | 82.4              | -89.5             | 18.3                | 5.60                               | 2.43               | 21.70                                  | 40.06                                        | 2.55                         | 0.7863                         | 30                    | 25                             | 24                     | 130                                     | 98.74       | 87.76       | 86.65       |
| 15 | IPA             | 82.4              | -89.5             | 18.3                | 5.60                               | 2.43               | 21.70                                  | 40.06                                        | 2.55                         | 0.7863                         | 30                    | 25                             | 24                     | 140                                     | 98.86       | 86.92       | 85.93       |
| 15 | IPA             | 82.4              | -89.5             | 18.3                | 5.60                               | 2.43               | 21.70                                  | 40.06                                        | 2.55                         | 0.7863                         | 30                    | 25                             | 24                     | 150                                     | 98.98       | 86.09       | 85.21       |
| 15 | IPA             | 82.4              | -89.5             | 18.3                | 5.60                               | 2.43               | 21.70                                  | 40.06                                        | 2.55                         | 0.7863                         | 30                    | 25                             | 24                     | 160                                     | 99.10       | 85.25       | 84.49       |
| 15 | IPA             | 82.4              | -89.5             | 18.3                | 5.60                               | 2.43               | 21.70                                  | 40.06                                        | 2.55                         | 0.7863                         | 30                    | 25                             | 24                     | 170                                     | 99.22       | 84.42       | 83.76       |
| 15 | IPA             | 82.4              | -89.5             | 18.3                | 5.60                               | 2.43               | 21.70                                  | 40.06                                        | 2.55                         | 0.7863                         | 30                    | 25                             | 24                     | 180                                     | 99.35       | 83.59       | 83.04       |
| 15 | IPA             | 82.4              | -89.5             | 18.3                | 5.60                               | 2.43               | 21.70                                  | 40.06                                        | 2.55                         | 0.7863                         | 30                    | 25                             | 24                     | 190                                     | 99.48       | 82.75       | 82.32       |
| 15 | IPA             | 82.4              | -89.5             | 18.3                | 5.60                               | 2.43               | 21.70                                  | 40.06                                        | 2.55                         | 0.7863                         | 30                    | 25                             | 24                     | 200                                     | 99.61       | 81.92       | 81.60       |
| 15 | 2-methylpentane | 60.3              | -153.7            | 1.88                | 0.27                               | 0.30               | 17.31                                  | 37.79                                        | 2.24                         | 0.6540                         | 30                    | 25                             | 24                     | 40                                      | 97.96       | 94.10       | 92.18       |
| 15 | 2-methylpentane | 60.3              | -153.7            | 1.88                | 0.27                               | 0.30               | 17.31                                  | 37.79                                        | 2.24                         | 0.6540                         | 30                    | 25                             | 24                     | 50                                      | 98.06       | 93.27       | 91.46       |
| 15 | 2-methylpentane | 60.3              | -153.7            | 1.88                | 0.27                               | 0.30               | 17.31                                  | 37.79                                        | 2.24                         | 0.6540                         | 30                    | 25                             | 24                     | 60                                      | 98.16       | 92.43       | 90.73       |
| 15 | 2-methylpentane | 60.3              | -153.7            | 1.88                | 0.27                               | 0.30               | 17.31                                  | 37.79                                        | 2.24                         | 0.6540                         | 30                    | 25                             | 24                     | 70                                      | 98.27       | 91.60       | 90.01       |

| w% | Solvent Name    | Boiling Point /°C | Melting point /°C | Dielectric constant | Dipole moment /( $10^{-30}$ C · m) | Viscosity /( $\text{mPa s}$ ) | Surface tension /( $\text{mN m}^{-1}$ ) | Heat of evaporation /( $\text{kJ mol}^{-1}$ ) | Heat capacity /( $\text{kJ}/(\text{kg} \cdot \text{K})$ ) | Density /( $\text{g ml}^{-1}$ ) | Soaking time /minutes | Volatilization temperature /°C | Volatilization time /h | Current Density /( $\text{mA cm}^{-2}$ ) | Pred. CE /% | Pred. VE /% | Pred. EE /% |
|----|-----------------|-------------------|-------------------|---------------------|------------------------------------|-------------------------------|-----------------------------------------|-----------------------------------------------|-----------------------------------------------------------|---------------------------------|-----------------------|--------------------------------|------------------------|------------------------------------------|-------------|-------------|-------------|
| 15 | 2-methylpentane | 60.3              | -153.7            | 1.88                | 0.27                               | 0.30                          | 17.31                                   | 37.79                                         | 2.24                                                      | 0.6540                          | 30                    | 25                             | 24                     | 80                                       | 98.37       | 90.76       | 89.29       |
| 15 | 2-methylpentane | 60.3              | -153.7            | 1.88                | 0.27                               | 0.30                          | 17.31                                   | 37.79                                         | 2.24                                                      | 0.6540                          | 30                    | 25                             | 24                     | 90                                       | 98.48       | 89.93       | 88.57       |
| 15 | 2-methylpentane | 60.3              | -153.7            | 1.88                | 0.27                               | 0.30                          | 17.31                                   | 37.79                                         | 2.24                                                      | 0.6540                          | 30                    | 25                             | 24                     | 100                                      | 98.60       | 89.10       | 87.84       |
| 15 | 2-methylpentane | 60.3              | -153.7            | 1.88                | 0.27                               | 0.30                          | 17.31                                   | 37.79                                         | 2.24                                                      | 0.6540                          | 30                    | 25                             | 24                     | 110                                      | 98.71       | 88.26       | 87.12       |
| 15 | 2-methylpentane | 60.3              | -153.7            | 1.88                | 0.27                               | 0.30                          | 17.31                                   | 37.79                                         | 2.24                                                      | 0.6540                          | 30                    | 25                             | 24                     | 120                                      | 98.83       | 87.43       | 86.40       |
| 15 | 2-methylpentane | 60.3              | -153.7            | 1.88                | 0.27                               | 0.30                          | 17.31                                   | 37.79                                         | 2.24                                                      | 0.6540                          | 30                    | 25                             | 24                     | 130                                      | 98.94       | 86.59       | 85.68       |
| 15 | 2-methylpentane | 60.3              | -153.7            | 1.88                | 0.27                               | 0.30                          | 17.31                                   | 37.79                                         | 2.24                                                      | 0.6540                          | 30                    | 25                             | 24                     | 140                                      | 99.06       | 85.76       | 84.96       |
| 15 | 2-methylpentane | 60.3              | -153.7            | 1.88                | 0.27                               | 0.30                          | 17.31                                   | 37.79                                         | 2.24                                                      | 0.6540                          | 30                    | 25                             | 24                     | 150                                      | 99.19       | 84.92       | 84.23       |
| 15 | 2-methylpentane | 60.3              | -153.7            | 1.88                | 0.27                               | 0.30                          | 17.31                                   | 37.79                                         | 2.24                                                      | 0.6540                          | 30                    | 25                             | 24                     | 160                                      | 99.31       | 84.09       | 83.51       |
| 15 | 2-methylpentane | 60.3              | -153.7            | 1.88                | 0.27                               | 0.30                          | 17.31                                   | 37.79                                         | 2.24                                                      | 0.6540                          | 30                    | 25                             | 24                     | 170                                      | 99.44       | 83.26       | 82.79       |
| 15 | 2-methylpentane | 60.3              | -153.7            | 1.88                | 0.27                               | 0.30                          | 17.31                                   | 37.79                                         | 2.24                                                      | 0.6540                          | 30                    | 25                             | 24                     | 180                                      | 99.57       | 82.42       | 82.07       |
| 15 | 2-methylpentane | 60.3              | -153.7            | 1.88                | 0.27                               | 0.30                          | 17.31                                   | 37.79                                         | 2.24                                                      | 0.6540                          | 30                    | 25                             | 24                     | 190                                      | 99.70       | 81.59       | 81.34       |
| 15 | 2-methylpentane | 60.3              | -153.7            | 1.88                | 0.27                               | 0.30                          | 17.31                                   | 37.79                                         | 2.24                                                      | 0.6540                          | 30                    | 25                             | 24                     | 200                                      | 99.84       | 80.75       | 80.62       |
| 15 | Heptane         | 98.4              | -90.6             | 1.924               | 0.00                               | 0.41                          | 19.60                                   | 38.02                                         | 2.23                                                      | 0.6840                          | 30                    | 25                             | 24                     | 40                                       | 97.60       | 93.95       | 91.70       |
| 15 | Heptane         | 98.4              | -90.6             | 1.924               | 0.00                               | 0.41                          | 19.60                                   | 38.02                                         | 2.23                                                      | 0.6840                          | 30                    | 25                             | 24                     | 50                                       | 97.70       | 93.12       | 90.98       |
| 15 | Heptane         | 98.4              | -90.6             | 1.924               | 0.00                               | 0.41                          | 19.60                                   | 38.02                                         | 2.23                                                      | 0.6840                          | 30                    | 25                             | 24                     | 60                                       | 97.80       | 92.29       | 90.25       |
| 15 | Heptane         | 98.4              | -90.6             | 1.924               | 0.00                               | 0.41                          | 19.60                                   | 38.02                                         | 2.23                                                      | 0.6840                          | 30                    | 25                             | 24                     | 70                                       | 97.90       | 91.45       | 89.53       |
| 15 | Heptane         | 98.4              | -90.6             | 1.924               | 0.00                               | 0.41                          | 19.60                                   | 38.02                                         | 2.23                                                      | 0.6840                          | 30                    | 25                             | 24                     | 80                                       | 98.01       | 90.62       | 88.81       |
| 15 | Heptane         | 98.4              | -90.6             | 1.924               | 0.00                               | 0.41                          | 19.60                                   | 38.02                                         | 2.23                                                      | 0.6840                          | 30                    | 25                             | 24                     | 90                                       | 98.11       | 89.78       | 88.09       |
| 15 | Heptane         | 98.4              | -90.6             | 1.924               | 0.00                               | 0.41                          | 19.60                                   | 38.02                                         | 2.23                                                      | 0.6840                          | 30                    | 25                             | 24                     | 100                                      | 98.22       | 88.95       | 87.37       |
| 15 | Heptane         | 98.4              | -90.6             | 1.924               | 0.00                               | 0.41                          | 19.60                                   | 38.02                                         | 2.23                                                      | 0.6840                          | 30                    | 25                             | 24                     | 110                                      | 98.33       | 88.11       | 86.64       |
| 15 | Heptane         | 98.4              | -90.6             | 1.924               | 0.00                               | 0.41                          | 19.60                                   | 38.02                                         | 2.23                                                      | 0.6840                          | 30                    | 25                             | 24                     | 120                                      | 98.44       | 87.28       | 85.92       |
| 15 | Heptane         | 98.4              | -90.6             | 1.924               | 0.00                               | 0.41                          | 19.60                                   | 38.02                                         | 2.23                                                      | 0.6840                          | 30                    | 25                             | 24                     | 130                                      | 98.56       | 86.45       | 85.20       |
| 15 | Heptane         | 98.4              | -90.6             | 1.924               | 0.00                               | 0.41                          | 19.60                                   | 38.02                                         | 2.23                                                      | 0.6840                          | 30                    | 25                             | 24                     | 140                                      | 98.67       | 85.61       | 84.48       |
| 15 | Heptane         | 98.4              | -90.6             | 1.924               | 0.00                               | 0.41                          | 19.60                                   | 38.02                                         | 2.23                                                      | 0.6840                          | 30                    | 25                             | 24                     | 150                                      | 98.79       | 84.78       | 83.75       |
| 15 | Heptane         | 98.4              | -90.6             | 1.924               | 0.00                               | 0.41                          | 19.60                                   | 38.02                                         | 2.23                                                      | 0.6840                          | 30                    | 25                             | 24                     | 160                                      | 98.92       | 83.94       | 83.03       |
| 15 | Heptane         | 98.4              | -90.6             | 1.924               | 0.00                               | 0.41                          | 19.60                                   | 38.02                                         | 2.23                                                      | 0.6840                          | 30                    | 25                             | 24                     | 170                                      | 99.04       | 83.11       | 82.31       |
| 15 | Heptane         | 98.4              | -90.6             | 1.924               | 0.00                               | 0.41                          | 19.60                                   | 38.02                                         | 2.23                                                      | 0.6840                          | 30                    | 25                             | 24                     | 180                                      | 99.17       | 82.27       | 81.59       |
| 15 | Heptane         | 98.4              | -90.6             | 1.924               | 0.00                               | 0.41                          | 19.60                                   | 38.02                                         | 2.23                                                      | 0.6840                          | 30                    | 25                             | 24                     | 190                                      | 99.30       | 81.44       | 80.87       |
| 15 | Heptane         | 98.4              | -90.6             | 1.924               | 0.00                               | 0.41                          | 19.60                                   | 38.02                                         | 2.23                                                      | 0.6840                          | 30                    | 25                             | 24                     | 200                                      | 99.43       | 80.61       | 80.14       |
| 15 | N-octane        | 125.7             | -56.8             | 1.948               | 0.00                               | 0.55                          | 21.76                                   | 41.51                                         | 2.23                                                      | 0.7025                          | 30                    | 25                             | 24                     | 40                                       | 97.54       | 94.59       | 92.26       |
| 15 | N-octane        | 125.7             | -56.8             | 1.948               | 0.00                               | 0.55                          | 21.76                                   | 41.51                                         | 2.23                                                      | 0.7025                          | 30                    | 25                             | 24                     | 50                                       | 97.63       | 93.76       | 91.54       |
| 15 | N-octane        | 125.7             | -56.8             | 1.948               | 0.00                               | 0.55                          | 21.76                                   | 41.51                                         | 2.23                                                      | 0.7025                          | 30                    | 25                             | 24                     | 60                                       | 97.73       | 92.92       | 90.82       |
| 15 | N-octane        | 125.7             | -56.8             | 1.948               | 0.00                               | 0.55                          | 21.76                                   | 41.51                                         | 2.23                                                      | 0.7025                          | 30                    | 25                             | 24                     | 70                                       | 97.83       | 92.09       | 90.09       |
| 15 | N-octane        | 125.7             | -56.8             | 1.948               | 0.00                               | 0.55                          | 21.76                                   | 41.51                                         | 2.23                                                      | 0.7025                          | 30                    | 25                             | 24                     | 80                                       | 97.94       | 91.25       | 89.37       |
| 15 | N-octane        | 125.7             | -56.8             | 1.948               | 0.00                               | 0.55                          | 21.76                                   | 41.51                                         | 2.23                                                      | 0.7025                          | 30                    | 25                             | 24                     | 90                                       | 98.04       | 90.42       | 88.65       |
| 15 | N-octane        | 125.7             | -56.8             | 1.948               | 0.00                               | 0.55                          | 21.76                                   | 41.51                                         | 2.23                                                      | 0.7025                          | 30                    | 25                             | 24                     | 100                                      | 98.15       | 89.58       | 87.93       |
| 15 | N-octane        | 125.7             | -56.8             | 1.948               | 0.00                               | 0.55                          | 21.76                                   | 41.51                                         | 2.23                                                      | 0.7025                          | 30                    | 25                             | 24                     | 110                                      | 98.26       | 88.75       | 87.20       |
| 15 | N-octane        | 125.7             | -56.8             | 1.948               | 0.00                               | 0.55                          | 21.76                                   | 41.51                                         | 2.23                                                      | 0.7025                          | 30                    | 25                             | 24                     | 120                                      | 98.37       | 87.92       | 86.48       |
| 15 | N-octane        | 125.7             | -56.8             | 1.948               | 0.00                               | 0.55                          | 21.76                                   | 41.51                                         | 2.23                                                      | 0.7025                          | 30                    | 25                             | 24                     | 130                                      | 98.48       | 87.08       | 85.76       |
| 15 | N-octane        | 125.7             | -56.8             | 1.948               | 0.00                               | 0.55                          | 21.76                                   | 41.51                                         | 2.23                                                      | 0.7025                          | 30                    | 25                             | 24                     | 140                                      | 98.60       | 86.25       | 85.04       |
| 15 | N-octane        | 125.7             | -56.8             | 1.948               | 0.00                               | 0.55                          | 21.76                                   | 41.51                                         | 2.23                                                      | 0.7025                          | 30                    | 25                             | 24                     | 150                                      | 98.72       | 85.41       | 84.32       |
| 15 | N-octane        | 125.7             | -56.8             | 1.948               | 0.00                               | 0.55                          | 21.76                                   | 41.51                                         | 2.23                                                      | 0.7025                          | 30                    | 25                             | 24                     | 160                                      | 98.84       | 84.58       | 83.59       |
| 15 | N-octane        | 125.7             | -56.8             | 1.948               | 0.00                               | 0.55                          | 21.76                                   | 41.51                                         | 2.23                                                      | 0.7025                          | 30                    | 25                             | 24                     | 170                                      | 98.96       | 83.74       | 82.87       |

| w% | Solvent Name    | Boiling Point /°C | Melting point /°C | Dielectric constant | Dipole moment /( $10^{-30}$ C · m) | Viscosity /( $\text{mPa s}$ ) | Surface tension /( $\text{mN m}^{-1}$ ) | Heat of evaporation /( $\text{kJ mol}^{-1}$ ) | Heat capacity /( $\text{kJ}/(\text{kg} \cdot \text{K})$ ) | Density /( $\text{g ml}^{-1}$ ) | Soaking time /minutes | Volatilization temperature /°C | Volatilization time /h | Current Density /( $\text{mA cm}^{-2}$ ) | Pred. CE /% | Pred. VE /% | Pred. EE /% |
|----|-----------------|-------------------|-------------------|---------------------|------------------------------------|-------------------------------|-----------------------------------------|-----------------------------------------------|-----------------------------------------------------------|---------------------------------|-----------------------|--------------------------------|------------------------|------------------------------------------|-------------|-------------|-------------|
| 15 | N-octane        | 125.7             | -56.8             | 1.948               | 0.00                               | 0.55                          | 21.76                                   | 41.51                                         | 2.23                                                      | 0.7025                          | 30                    | 25                             | 24                     | 180                                      | 99.08       | 82.91       | 82.15       |
| 15 | N-octane        | 125.7             | -56.8             | 1.948               | 0.00                               | 0.55                          | 21.76                                   | 41.51                                         | 2.23                                                      | 0.7025                          | 30                    | 25                             | 24                     | 190                                      | 99.21       | 82.08       | 81.43       |
| 15 | N-octane        | 125.7             | -56.8             | 1.948               | 0.00                               | 0.55                          | 21.76                                   | 41.51                                         | 2.23                                                      | 0.7025                          | 30                    | 25                             | 24                     | 200                                      | 99.34       | 81.24       | 80.70       |
| 15 | Isopropyl ether | 68.5              | -85.9             | 4.48                | 4.00                               | 0.33                          | 19.40                                   | 29.17                                         | 2.20                                                      | 0.7244                          | 30                    | 25                             | 24                     | 40                                       | 97.81       | 92.45       | 90.42       |
| 15 | Isopropyl ether | 68.5              | -85.9             | 4.48                | 4.00                               | 0.33                          | 19.40                                   | 29.17                                         | 2.20                                                      | 0.7244                          | 30                    | 25                             | 24                     | 50                                       | 97.91       | 91.62       | 89.70       |
| 15 | Isopropyl ether | 68.5              | -85.9             | 4.48                | 4.00                               | 0.33                          | 19.40                                   | 29.17                                         | 2.20                                                      | 0.7244                          | 30                    | 25                             | 24                     | 60                                       | 98.01       | 90.78       | 88.98       |
| 15 | Isopropyl ether | 68.5              | -85.9             | 4.48                | 4.00                               | 0.33                          | 19.40                                   | 29.17                                         | 2.20                                                      | 0.7244                          | 30                    | 25                             | 24                     | 70                                       | 98.12       | 89.95       | 88.26       |
| 15 | Isopropyl ether | 68.5              | -85.9             | 4.48                | 4.00                               | 0.33                          | 19.40                                   | 29.17                                         | 2.20                                                      | 0.7244                          | 30                    | 25                             | 24                     | 80                                       | 98.23       | 89.11       | 87.54       |
| 15 | Isopropyl ether | 68.5              | -85.9             | 4.48                | 4.00                               | 0.33                          | 19.40                                   | 29.17                                         | 2.20                                                      | 0.7244                          | 30                    | 25                             | 24                     | 90                                       | 98.34       | 88.28       | 86.81       |
| 15 | Isopropyl ether | 68.5              | -85.9             | 4.48                | 4.00                               | 0.33                          | 19.40                                   | 29.17                                         | 2.20                                                      | 0.7244                          | 30                    | 25                             | 24                     | 100                                      | 98.45       | 87.45       | 86.09       |
| 15 | Isopropyl ether | 68.5              | -85.9             | 4.48                | 4.00                               | 0.33                          | 19.40                                   | 29.17                                         | 2.20                                                      | 0.7244                          | 30                    | 25                             | 24                     | 110                                      | 98.57       | 86.61       | 85.37       |
| 15 | Isopropyl ether | 68.5              | -85.9             | 4.48                | 4.00                               | 0.33                          | 19.40                                   | 29.17                                         | 2.20                                                      | 0.7244                          | 30                    | 25                             | 24                     | 120                                      | 98.68       | 85.78       | 84.65       |
| 15 | Isopropyl ether | 68.5              | -85.9             | 4.48                | 4.00                               | 0.33                          | 19.40                                   | 29.17                                         | 2.20                                                      | 0.7244                          | 30                    | 25                             | 24                     | 130                                      | 98.80       | 84.94       | 83.92       |
| 15 | Isopropyl ether | 68.5              | -85.9             | 4.48                | 4.00                               | 0.33                          | 19.40                                   | 29.17                                         | 2.20                                                      | 0.7244                          | 30                    | 25                             | 24                     | 140                                      | 98.92       | 84.11       | 83.20       |
| 15 | Isopropyl ether | 68.5              | -85.9             | 4.48                | 4.00                               | 0.33                          | 19.40                                   | 29.17                                         | 2.20                                                      | 0.7244                          | 30                    | 25                             | 24                     | 150                                      | 99.05       | 83.27       | 82.48       |
| 15 | Isopropyl ether | 68.5              | -85.9             | 4.48                | 4.00                               | 0.33                          | 19.40                                   | 29.17                                         | 2.20                                                      | 0.7244                          | 30                    | 25                             | 24                     | 160                                      | 99.17       | 82.44       | 81.76       |
| 15 | Isopropyl ether | 68.5              | -85.9             | 4.48                | 4.00                               | 0.33                          | 19.40                                   | 29.17                                         | 2.20                                                      | 0.7244                          | 30                    | 25                             | 24                     | 170                                      | 99.30       | 81.60       | 81.04       |
| 15 | Isopropyl ether | 68.5              | -85.9             | 4.48                | 4.00                               | 0.33                          | 19.40                                   | 29.17                                         | 2.20                                                      | 0.7244                          | 30                    | 25                             | 24                     | 180                                      | 99.43       | 80.77       | 80.31       |
| 15 | Isopropyl ether | 68.5              | -85.9             | 4.48                | 4.00                               | 0.33                          | 19.40                                   | 29.17                                         | 2.20                                                      | 0.7244                          | 30                    | 25                             | 24                     | 190                                      | 99.57       | 79.94       | 79.59       |
| 15 | Isopropyl ether | 68.5              | -85.9             | 4.48                | 4.00                               | 0.33                          | 19.40                                   | 29.17                                         | 2.20                                                      | 0.7244                          | 30                    | 25                             | 24                     | 200                                      | 99.71       | 79.10       | 78.87       |
| 15 | hexane          | 68.7              | -95.3             | 1.89                | 0.27                               | 0.31                          | 17.90                                   | 33.12                                         | 2.28                                                      | 0.6590                          | 30                    | 25                             | 24                     | 40                                       | 97.42       | 92.71       | 90.32       |
| 15 | hexane          | 68.7              | -95.3             | 1.89                | 0.27                               | 0.31                          | 17.90                                   | 33.12                                         | 2.28                                                      | 0.6590                          | 30                    | 25                             | 24                     | 50                                       | 97.52       | 91.88       | 89.60       |
| 15 | hexane          | 68.7              | -95.3             | 1.89                | 0.27                               | 0.31                          | 17.90                                   | 33.12                                         | 2.28                                                      | 0.6590                          | 30                    | 25                             | 24                     | 60                                       | 97.62       | 91.05       | 88.88       |
| 15 | hexane          | 68.7              | -95.3             | 1.89                | 0.27                               | 0.31                          | 17.90                                   | 33.12                                         | 2.28                                                      | 0.6590                          | 30                    | 25                             | 24                     | 70                                       | 97.72       | 90.21       | 88.16       |
| 15 | hexane          | 68.7              | -95.3             | 1.89                | 0.27                               | 0.31                          | 17.90                                   | 33.12                                         | 2.28                                                      | 0.6590                          | 30                    | 25                             | 24                     | 80                                       | 97.83       | 89.38       | 87.43       |
| 15 | hexane          | 68.7              | -95.3             | 1.89                | 0.27                               | 0.31                          | 17.90                                   | 33.12                                         | 2.28                                                      | 0.6590                          | 30                    | 25                             | 24                     | 90                                       | 97.93       | 88.54       | 86.71       |
| 15 | hexane          | 68.7              | -95.3             | 1.89                | 0.27                               | 0.31                          | 17.90                                   | 33.12                                         | 2.28                                                      | 0.6590                          | 30                    | 25                             | 24                     | 100                                      | 98.04       | 87.71       | 85.99       |
| 15 | hexane          | 68.7              | -95.3             | 1.89                | 0.27                               | 0.31                          | 17.90                                   | 33.12                                         | 2.28                                                      | 0.6590                          | 30                    | 25                             | 24                     | 110                                      | 98.15       | 86.87       | 85.27       |
| 15 | hexane          | 68.7              | -95.3             | 1.89                | 0.27                               | 0.31                          | 17.90                                   | 33.12                                         | 2.28                                                      | 0.6590                          | 30                    | 25                             | 24                     | 120                                      | 98.26       | 86.04       | 84.54       |
| 15 | hexane          | 68.7              | -95.3             | 1.89                | 0.27                               | 0.31                          | 17.90                                   | 33.12                                         | 2.28                                                      | 0.6590                          | 30                    | 25                             | 24                     | 130                                      | 98.38       | 85.21       | 83.82       |
| 15 | hexane          | 68.7              | -95.3             | 1.89                | 0.27                               | 0.31                          | 17.90                                   | 33.12                                         | 2.28                                                      | 0.6590                          | 30                    | 25                             | 24                     | 140                                      | 98.49       | 84.37       | 83.10       |
| 15 | hexane          | 68.7              | -95.3             | 1.89                | 0.27                               | 0.31                          | 17.90                                   | 33.12                                         | 2.28                                                      | 0.6590                          | 30                    | 25                             | 24                     | 150                                      | 98.61       | 83.54       | 82.38       |
| 15 | hexane          | 68.7              | -95.3             | 1.89                | 0.27                               | 0.31                          | 17.90                                   | 33.12                                         | 2.28                                                      | 0.6590                          | 30                    | 25                             | 24                     | 160                                      | 98.73       | 82.70       | 81.66       |
| 15 | hexane          | 68.7              | -95.3             | 1.89                | 0.27                               | 0.31                          | 17.90                                   | 33.12                                         | 2.28                                                      | 0.6590                          | 30                    | 25                             | 24                     | 170                                      | 98.86       | 81.87       | 80.93       |
| 15 | hexane          | 68.7              | -95.3             | 1.89                | 0.27                               | 0.31                          | 17.90                                   | 33.12                                         | 2.28                                                      | 0.6590                          | 30                    | 25                             | 24                     | 180                                      | 98.99       | 81.03       | 80.21       |
| 15 | hexane          | 68.7              | -95.3             | 1.89                | 0.27                               | 0.31                          | 17.90                                   | 33.12                                         | 2.28                                                      | 0.6590                          | 30                    | 25                             | 24                     | 190                                      | 99.11       | 80.20       | 79.49       |
| 15 | hexane          | 68.7              | -95.3             | 1.89                | 0.27                               | 0.31                          | 17.90                                   | 33.12                                         | 2.28                                                      | 0.6590                          | 30                    | 25                             | 24                     | 200                                      | 99.25       | 79.37       | 78.77       |
| 15 | acetone         | 56.1              | -94.7             | 20.7                | 8.97                               | 0.32                          | 23.70                                   | 29.11                                         | 1.28                                                      | 0.7906                          | 30                    | 25                             | 24                     | 40                                       | 98.68       | 92.99       | 91.77       |
| 15 | acetone         | 56.1              | -94.7             | 20.7                | 8.97                               | 0.32                          | 23.70                                   | 29.11                                         | 1.28                                                      | 0.7906                          | 30                    | 25                             | 24                     | 50                                       | 98.79       | 92.16       | 91.05       |
| 15 | acetone         | 56.1              | -94.7             | 20.7                | 8.97                               | 0.32                          | 23.70                                   | 29.11                                         | 1.28                                                      | 0.7906                          | 30                    | 25                             | 24                     | 60                                       | 98.90       | 91.33       | 90.32       |
| 15 | acetone         | 56.1              | -94.7             | 20.7                | 8.97                               | 0.32                          | 23.70                                   | 29.11                                         | 1.28                                                      | 0.7906                          | 30                    | 25                             | 24                     | 70                                       | 99.02       | 90.49       | 89.60       |
| 15 | acetone         | 56.1              | -94.7             | 20.7                | 8.97                               | 0.32                          | 23.70                                   | 29.11                                         | 1.28                                                      | 0.7906                          | 30                    | 25                             | 24                     | 80                                       | 99.13       | 89.66       | 88.88       |
| 15 | acetone         | 56.1              | -94.7             | 20.7                | 8.97                               | 0.32                          | 23.70                                   | 29.11                                         | 1.28                                                      | 0.7906                          | 30                    | 25                             | 24                     | 90                                       | 99.25       | 88.82       | 88.16       |
| 15 | acetone         | 56.1              | -94.7             | 20.7                | 8.97                               | 0.32                          | 23.70                                   | 29.11                                         | 1.28                                                      | 0.7906                          | 30                    | 25                             | 24                     | 100                                      | 99.37       | 87.99       | 87.43       |

| w% | Solvent Name | Boiling Point /°C | Melting point /°C | Dielectric constant | Dipole moment /( $10^{-30}$ C · m) | Viscosity /( $\text{mPa s}$ ) | Surface tension /( $\text{mN m}^{-1}$ ) | Heat of evaporation /( $\text{kJ mol}^{-1}$ ) | Heat capacity /( $\text{kJ}/(\text{kg} \cdot \text{K})$ ) | Density /( $\text{g ml}^{-1}$ ) | Soaking time /minutes | Volatilization temperature /°C | Volatilization time /h | Current Density /( $\text{mA cm}^{-2}$ ) | Pred. CE /% | Pred. VE /% | Pred. EE /% |
|----|--------------|-------------------|-------------------|---------------------|------------------------------------|-------------------------------|-----------------------------------------|-----------------------------------------------|-----------------------------------------------------------|---------------------------------|-----------------------|--------------------------------|------------------------|------------------------------------------|-------------|-------------|-------------|
| 15 | acetone      | 56.1              | -94.7             | 20.7                | 8.97                               | 0.32                          | 23.70                                   | 29.11                                         | 1.28                                                      | 0.7906                          | 30                    | 25                             | 24                     | 110                                      | 99.49       | 87.15       | 86.71       |
| 15 | acetone      | 56.1              | -94.7             | 20.7                | 8.97                               | 0.32                          | 23.70                                   | 29.11                                         | 1.28                                                      | 0.7906                          | 30                    | 25                             | 24                     | 120                                      | 99.62       | 86.32       | 85.99       |
| 15 | acetone      | 56.1              | -94.7             | 20.7                | 8.97                               | 0.32                          | 23.70                                   | 29.11                                         | 1.28                                                      | 0.7906                          | 30                    | 25                             | 24                     | 130                                      | 99.75       | 85.49       | 85.27       |
| 15 | acetone      | 56.1              | -94.7             | 20.7                | 8.97                               | 0.32                          | 23.70                                   | 29.11                                         | 1.28                                                      | 0.7906                          | 30                    | 25                             | 24                     | 140                                      | 99.88       | 84.65       | 84.55       |
| 15 | acetone      | 56.1              | -94.7             | 20.7                | 8.97                               | 0.32                          | 23.70                                   | 29.11                                         | 1.28                                                      | 0.7906                          | 30                    | 25                             | 24                     | 150                                      | 100.01      | 83.82       | 83.82       |
| 15 | acetone      | 56.1              | -94.7             | 20.7                | 8.97                               | 0.32                          | 23.70                                   | 29.11                                         | 1.28                                                      | 0.7906                          | 30                    | 25                             | 24                     | 160                                      | 100.14      | 82.98       | 83.10       |
| 15 | acetone      | 56.1              | -94.7             | 20.7                | 8.97                               | 0.32                          | 23.70                                   | 29.11                                         | 1.28                                                      | 0.7906                          | 30                    | 25                             | 24                     | 170                                      | 100.28      | 82.15       | 82.38       |
| 15 | acetone      | 56.1              | -94.7             | 20.7                | 8.97                               | 0.32                          | 23.70                                   | 29.11                                         | 1.28                                                      | 0.7906                          | 30                    | 25                             | 24                     | 180                                      | 100.42      | 81.31       | 81.66       |
| 15 | acetone      | 56.1              | -94.7             | 20.7                | 8.97                               | 0.32                          | 23.70                                   | 29.11                                         | 1.28                                                      | 0.7906                          | 30                    | 25                             | 24                     | 190                                      | 100.57      | 80.48       | 80.93       |
| 15 | acetone      | 56.1              | -94.7             | 20.7                | 8.97                               | 0.32                          | 23.70                                   | 29.11                                         | 1.28                                                      | 0.7906                          | 30                    | 25                             | 24                     | 200                                      | 100.71      | 79.65       | 80.21       |
| 15 | n-propanol   | 97.2              | -126.2            | 22.2                | 5.53                               | 2.26                          | 23.80                                   | 40.91                                         | 2.45                                                      | 0.8036                          | 30                    | 25                             | 24                     | 40                                       | 98.20       | 96.05       | 94.32       |
| 15 | n-propanol   | 97.2              | -126.2            | 22.2                | 5.53                               | 2.26                          | 23.80                                   | 40.91                                         | 2.45                                                      | 0.8036                          | 30                    | 25                             | 24                     | 50                                       | 98.30       | 95.22       | 93.60       |
| 15 | n-propanol   | 97.2              | -126.2            | 22.2                | 5.53                               | 2.26                          | 23.80                                   | 40.91                                         | 2.45                                                      | 0.8036                          | 30                    | 25                             | 24                     | 60                                       | 98.40       | 94.38       | 92.88       |
| 15 | n-propanol   | 97.2              | -126.2            | 22.2                | 5.53                               | 2.26                          | 23.80                                   | 40.91                                         | 2.45                                                      | 0.8036                          | 30                    | 25                             | 24                     | 70                                       | 98.51       | 93.55       | 92.15       |
| 15 | n-propanol   | 97.2              | -126.2            | 22.2                | 5.53                               | 2.26                          | 23.80                                   | 40.91                                         | 2.45                                                      | 0.8036                          | 30                    | 25                             | 24                     | 80                                       | 98.62       | 92.71       | 91.43       |
| 15 | n-propanol   | 97.2              | -126.2            | 22.2                | 5.53                               | 2.26                          | 23.80                                   | 40.91                                         | 2.45                                                      | 0.8036                          | 30                    | 25                             | 24                     | 90                                       | 98.73       | 91.88       | 90.71       |
| 15 | n-propanol   | 97.2              | -126.2            | 22.2                | 5.53                               | 2.26                          | 23.80                                   | 40.91                                         | 2.45                                                      | 0.8036                          | 30                    | 25                             | 24                     | 100                                      | 98.84       | 91.05       | 89.99       |
| 15 | n-propanol   | 97.2              | -126.2            | 22.2                | 5.53                               | 2.26                          | 23.80                                   | 40.91                                         | 2.45                                                      | 0.8036                          | 30                    | 25                             | 24                     | 110                                      | 98.95       | 90.21       | 89.26       |
| 15 | n-propanol   | 97.2              | -126.2            | 22.2                | 5.53                               | 2.26                          | 23.80                                   | 40.91                                         | 2.45                                                      | 0.8036                          | 30                    | 25                             | 24                     | 120                                      | 99.07       | 89.38       | 88.54       |
| 15 | n-propanol   | 97.2              | -126.2            | 22.2                | 5.53                               | 2.26                          | 23.80                                   | 40.91                                         | 2.45                                                      | 0.8036                          | 30                    | 25                             | 24                     | 130                                      | 99.18       | 88.54       | 87.82       |
| 15 | n-propanol   | 97.2              | -126.2            | 22.2                | 5.53                               | 2.26                          | 23.80                                   | 40.91                                         | 2.45                                                      | 0.8036                          | 30                    | 25                             | 24                     | 140                                      | 99.30       | 87.71       | 87.10       |
| 15 | n-propanol   | 97.2              | -126.2            | 22.2                | 5.53                               | 2.26                          | 23.80                                   | 40.91                                         | 2.45                                                      | 0.8036                          | 30                    | 25                             | 24                     | 150                                      | 99.43       | 86.87       | 86.38       |
| 15 | n-propanol   | 97.2              | -126.2            | 22.2                | 5.53                               | 2.26                          | 23.80                                   | 40.91                                         | 2.45                                                      | 0.8036                          | 30                    | 25                             | 24                     | 160                                      | 99.55       | 86.04       | 85.65       |
| 15 | n-propanol   | 97.2              | -126.2            | 22.2                | 5.53                               | 2.26                          | 23.80                                   | 40.91                                         | 2.45                                                      | 0.8036                          | 30                    | 25                             | 24                     | 170                                      | 99.68       | 85.21       | 84.93       |
| 15 | n-propanol   | 97.2              | -126.2            | 22.2                | 5.53                               | 2.26                          | 23.80                                   | 40.91                                         | 2.45                                                      | 0.8036                          | 30                    | 25                             | 24                     | 180                                      | 99.81       | 84.37       | 84.21       |
| 15 | n-propanol   | 97.2              | -126.2            | 22.2                | 5.53                               | 2.26                          | 23.80                                   | 40.91                                         | 2.45                                                      | 0.8036                          | 30                    | 25                             | 24                     | 190                                      | 99.94       | 83.54       | 83.49       |
| 15 | n-propanol   | 97.2              | -126.2            | 22.2                | 5.53                               | 2.26                          | 23.80                                   | 40.91                                         | 2.45                                                      | 0.8036                          | 30                    | 25                             | 24                     | 200                                      | 100.07      | 82.70       | 82.76       |
| 15 | n-butanol    | 117.7             | -89.8             | 17.1                | 5.60                               | 2.95                          | 24.60                                   | 43.86                                         | 2.33                                                      | 0.8097                          | 30                    | 25                             | 24                     | 40                                       | 97.82       | 96.61       | 94.50       |
| 15 | n-butanol    | 117.7             | -89.8             | 17.1                | 5.60                               | 2.95                          | 24.60                                   | 43.86                                         | 2.33                                                      | 0.8097                          | 30                    | 25                             | 24                     | 50                                       | 97.92       | 95.77       | 93.78       |
| 15 | n-butanol    | 117.7             | -89.8             | 17.1                | 5.60                               | 2.95                          | 24.60                                   | 43.86                                         | 2.33                                                      | 0.8097                          | 30                    | 25                             | 24                     | 60                                       | 98.02       | 94.94       | 93.06       |
| 15 | n-butanol    | 117.7             | -89.8             | 17.1                | 5.60                               | 2.95                          | 24.60                                   | 43.86                                         | 2.33                                                      | 0.8097                          | 30                    | 25                             | 24                     | 70                                       | 98.12       | 94.11       | 92.34       |
| 15 | n-butanol    | 117.7             | -89.8             | 17.1                | 5.60                               | 2.95                          | 24.60                                   | 43.86                                         | 2.33                                                      | 0.8097                          | 30                    | 25                             | 24                     | 80                                       | 98.23       | 93.27       | 91.62       |
| 15 | n-butanol    | 117.7             | -89.8             | 17.1                | 5.60                               | 2.95                          | 24.60                                   | 43.86                                         | 2.33                                                      | 0.8097                          | 30                    | 25                             | 24                     | 90                                       | 98.33       | 92.44       | 90.89       |
| 15 | n-butanol    | 117.7             | -89.8             | 17.1                | 5.60                               | 2.95                          | 24.60                                   | 43.86                                         | 2.33                                                      | 0.8097                          | 30                    | 25                             | 24                     | 100                                      | 98.44       | 91.60       | 90.17       |
| 15 | n-butanol    | 117.7             | -89.8             | 17.1                | 5.60                               | 2.95                          | 24.60                                   | 43.86                                         | 2.33                                                      | 0.8097                          | 30                    | 25                             | 24                     | 110                                      | 98.55       | 90.77       | 89.45       |
| 15 | n-butanol    | 117.7             | -89.8             | 17.1                | 5.60                               | 2.95                          | 24.60                                   | 43.86                                         | 2.33                                                      | 0.8097                          | 30                    | 25                             | 24                     | 120                                      | 98.66       | 89.93       | 88.73       |
| 15 | n-butanol    | 117.7             | -89.8             | 17.1                | 5.60                               | 2.95                          | 24.60                                   | 43.86                                         | 2.33                                                      | 0.8097                          | 30                    | 25                             | 24                     | 130                                      | 98.77       | 89.10       | 88.00       |
| 15 | n-butanol    | 117.7             | -89.8             | 17.1                | 5.60                               | 2.95                          | 24.60                                   | 43.86                                         | 2.33                                                      | 0.8097                          | 30                    | 25                             | 24                     | 140                                      | 98.89       | 88.26       | 87.28       |
| 15 | n-butanol    | 117.7             | -89.8             | 17.1                | 5.60                               | 2.95                          | 24.60                                   | 43.86                                         | 2.33                                                      | 0.8097                          | 30                    | 25                             | 24                     | 150                                      | 99.01       | 87.43       | 86.56       |
| 15 | n-butanol    | 117.7             | -89.8             | 17.1                | 5.60                               | 2.95                          | 24.60                                   | 43.86                                         | 2.33                                                      | 0.8097                          | 30                    | 25                             | 24                     | 160                                      | 99.12       | 86.60       | 85.84       |
| 15 | n-butanol    | 117.7             | -89.8             | 17.1                | 5.60                               | 2.95                          | 24.60                                   | 43.86                                         | 2.33                                                      | 0.8097                          | 30                    | 25                             | 24                     | 170                                      | 99.25       | 85.76       | 85.12       |
| 15 | n-butanol    | 117.7             | -89.8             | 17.1                | 5.60                               | 2.95                          | 24.60                                   | 43.86                                         | 2.33                                                      | 0.8097                          | 30                    | 25                             | 24                     | 180                                      | 99.37       | 84.93       | 84.39       |
| 15 | n-butanol    | 117.7             | -89.8             | 17.1                | 5.60                               | 2.95                          | 24.60                                   | 43.86                                         | 2.33                                                      | 0.8097                          | 30                    | 25                             | 24                     | 190                                      | 99.50       | 84.09       | 83.67       |
| 15 | n-butanol    | 117.7             | -89.8             | 17.1                | 5.60                               | 2.95                          | 24.60                                   | 43.86                                         | 2.33                                                      | 0.8097                          | 30                    | 25                             | 24                     | 200                                      | 99.63       | 83.26       | 82.95       |

| w% | Solvent Name | Boiling Point /°C | Melting point /°C | Dielectric constant | Dipole moment /( $10^{-30}$ C · m) | Viscosity /( $\text{mPa s}$ ) | Surface tension /( $\text{mN m}^{-1}$ ) | Heat of evaporation /( $\text{kJ mol}^{-1}$ ) | Heat capacity /( $\text{kJ}/(\text{kg} \cdot \text{K})$ ) | Density /( $\text{g ml}^{-1}$ ) | Soaking time /minutes | Volatilization temperature /°C | Volatilization time /h | Current Density /( $\text{mA cm}^{-2}$ ) | Pred. CE /% | Pred. VE /% | Pred. EE /% |
|----|--------------|-------------------|-------------------|---------------------|------------------------------------|-------------------------------|-----------------------------------------|-----------------------------------------------|-----------------------------------------------------------|---------------------------------|-----------------------|--------------------------------|------------------------|------------------------------------------|-------------|-------------|-------------|
| 15 | IPA          | 107.9             | -108.0            | 17.95               | 5.97                               | 4.00                          | 23.00                                   | 42.56                                         | 2.39                                                      | 0.8020                          | 30                    | 25                             | 24                     | 40                                       | 97.51       | 96.77       | 94.36       |
| 15 | IPA          | 107.9             | -108.0            | 17.95               | 5.97                               | 4.00                          | 23.00                                   | 42.56                                         | 2.39                                                      | 0.8020                          | 30                    | 25                             | 24                     | 50                                       | 97.60       | 95.94       | 93.64       |
| 15 | IPA          | 107.9             | -108.0            | 17.95               | 5.97                               | 4.00                          | 23.00                                   | 42.56                                         | 2.39                                                      | 0.8020                          | 30                    | 25                             | 24                     | 60                                       | 97.70       | 95.11       | 92.92       |
| 15 | IPA          | 107.9             | -108.0            | 17.95               | 5.97                               | 4.00                          | 23.00                                   | 42.56                                         | 2.39                                                      | 0.8020                          | 30                    | 25                             | 24                     | 70                                       | 97.80       | 94.27       | 92.19       |
| 15 | IPA          | 107.9             | -108.0            | 17.95               | 5.97                               | 4.00                          | 23.00                                   | 42.56                                         | 2.39                                                      | 0.8020                          | 30                    | 25                             | 24                     | 80                                       | 97.90       | 93.44       | 91.47       |
| 15 | IPA          | 107.9             | -108.0            | 17.95               | 5.97                               | 4.00                          | 23.00                                   | 42.56                                         | 2.39                                                      | 0.8020                          | 30                    | 25                             | 24                     | 90                                       | 98.00       | 92.60       | 90.75       |
| 15 | IPA          | 107.9             | -108.0            | 17.95               | 5.97                               | 4.00                          | 23.00                                   | 42.56                                         | 2.39                                                      | 0.8020                          | 30                    | 25                             | 24                     | 100                                      | 98.10       | 91.77       | 90.03       |
| 15 | IPA          | 107.9             | -108.0            | 17.95               | 5.97                               | 4.00                          | 23.00                                   | 42.56                                         | 2.39                                                      | 0.8020                          | 30                    | 25                             | 24                     | 110                                      | 98.21       | 90.93       | 89.31       |
| 15 | IPA          | 107.9             | -108.0            | 17.95               | 5.97                               | 4.00                          | 23.00                                   | 42.56                                         | 2.39                                                      | 0.8020                          | 30                    | 25                             | 24                     | 120                                      | 98.32       | 90.10       | 88.58       |
| 15 | IPA          | 107.9             | -108.0            | 17.95               | 5.97                               | 4.00                          | 23.00                                   | 42.56                                         | 2.39                                                      | 0.8020                          | 30                    | 25                             | 24                     | 130                                      | 98.43       | 89.27       | 87.86       |
| 15 | IPA          | 107.9             | -108.0            | 17.95               | 5.97                               | 4.00                          | 23.00                                   | 42.56                                         | 2.39                                                      | 0.8020                          | 30                    | 25                             | 24                     | 140                                      | 98.54       | 88.43       | 87.14       |
| 15 | IPA          | 107.9             | -108.0            | 17.95               | 5.97                               | 4.00                          | 23.00                                   | 42.56                                         | 2.39                                                      | 0.8020                          | 30                    | 25                             | 24                     | 150                                      | 98.65       | 87.60       | 86.42       |
| 15 | IPA          | 107.9             | -108.0            | 17.95               | 5.97                               | 4.00                          | 23.00                                   | 42.56                                         | 2.39                                                      | 0.8020                          | 30                    | 25                             | 24                     | 160                                      | 98.77       | 86.76       | 85.69       |
| 15 | IPA          | 107.9             | -108.0            | 17.95               | 5.97                               | 4.00                          | 23.00                                   | 42.56                                         | 2.39                                                      | 0.8020                          | 30                    | 25                             | 24                     | 170                                      | 98.89       | 85.93       | 84.97       |
| 15 | IPA          | 107.9             | -108.0            | 17.95               | 5.97                               | 4.00                          | 23.00                                   | 42.56                                         | 2.39                                                      | 0.8020                          | 30                    | 25                             | 24                     | 180                                      | 99.01       | 85.09       | 84.25       |
| 15 | IPA          | 107.9             | -108.0            | 17.95               | 5.97                               | 4.00                          | 23.00                                   | 42.56                                         | 2.39                                                      | 0.8020                          | 30                    | 25                             | 24                     | 190                                      | 99.13       | 84.26       | 83.53       |
| 15 | IPA          | 107.9             | -108.0            | 17.95               | 5.97                               | 4.00                          | 23.00                                   | 42.56                                         | 2.39                                                      | 0.8020                          | 30                    | 25                             | 24                     | 200                                      | 99.26       | 83.42       | 82.81       |
| 15 | n-Pentanol   | 138.0             | -78.2             | 13.9                | 6.00                               | 3.31                          | 25.60                                   | 44.51                                         | 2.98                                                      | 0.8144                          | 30                    | 25                             | 24                     | 40                                       | 97.73       | 97.05       | 94.85       |
| 15 | n-Pentanol   | 138.0             | -78.2             | 13.9                | 6.00                               | 3.31                          | 25.60                                   | 44.51                                         | 2.98                                                      | 0.8144                          | 30                    | 25                             | 24                     | 50                                       | 97.83       | 96.22       | 94.13       |
| 15 | n-Pentanol   | 138.0             | -78.2             | 13.9                | 6.00                               | 3.31                          | 25.60                                   | 44.51                                         | 2.98                                                      | 0.8144                          | 30                    | 25                             | 24                     | 60                                       | 97.93       | 95.39       | 93.41       |
| 15 | n-Pentanol   | 138.0             | -78.2             | 13.9                | 6.00                               | 3.31                          | 25.60                                   | 44.51                                         | 2.98                                                      | 0.8144                          | 30                    | 25                             | 24                     | 70                                       | 98.03       | 94.55       | 92.68       |
| 15 | n-Pentanol   | 138.0             | -78.2             | 13.9                | 6.00                               | 3.31                          | 25.60                                   | 44.51                                         | 2.98                                                      | 0.8144                          | 30                    | 25                             | 24                     | 80                                       | 98.13       | 93.72       | 91.96       |
| 15 | n-Pentanol   | 138.0             | -78.2             | 13.9                | 6.00                               | 3.31                          | 25.60                                   | 44.51                                         | 2.98                                                      | 0.8144                          | 30                    | 25                             | 24                     | 90                                       | 98.23       | 92.88       | 91.24       |
| 15 | n-Pentanol   | 138.0             | -78.2             | 13.9                | 6.00                               | 3.31                          | 25.60                                   | 44.51                                         | 2.98                                                      | 0.8144                          | 30                    | 25                             | 24                     | 100                                      | 98.34       | 92.05       | 90.52       |
| 15 | n-Pentanol   | 138.0             | -78.2             | 13.9                | 6.00                               | 3.31                          | 25.60                                   | 44.51                                         | 2.98                                                      | 0.8144                          | 30                    | 25                             | 24                     | 110                                      | 98.44       | 91.21       | 89.80       |
| 15 | n-Pentanol   | 138.0             | -78.2             | 13.9                | 6.00                               | 3.31                          | 25.60                                   | 44.51                                         | 2.98                                                      | 0.8144                          | 30                    | 25                             | 24                     | 120                                      | 98.55       | 90.38       | 89.07       |
| 15 | n-Pentanol   | 138.0             | -78.2             | 13.9                | 6.00                               | 3.31                          | 25.60                                   | 44.51                                         | 2.98                                                      | 0.8144                          | 30                    | 25                             | 24                     | 130                                      | 98.67       | 89.54       | 88.35       |
| 15 | n-Pentanol   | 138.0             | -78.2             | 13.9                | 6.00                               | 3.31                          | 25.60                                   | 44.51                                         | 2.98                                                      | 0.8144                          | 30                    | 25                             | 24                     | 140                                      | 98.78       | 88.71       | 87.63       |
| 15 | n-Pentanol   | 138.0             | -78.2             | 13.9                | 6.00                               | 3.31                          | 25.60                                   | 44.51                                         | 2.98                                                      | 0.8144                          | 30                    | 25                             | 24                     | 150                                      | 98.90       | 87.88       | 86.91       |
| 15 | n-Pentanol   | 138.0             | -78.2             | 13.9                | 6.00                               | 3.31                          | 25.60                                   | 44.51                                         | 2.98                                                      | 0.8144                          | 30                    | 25                             | 24                     | 160                                      | 99.01       | 87.04       | 86.18       |
| 15 | n-Pentanol   | 138.0             | -78.2             | 13.9                | 6.00                               | 3.31                          | 25.60                                   | 44.51                                         | 2.98                                                      | 0.8144                          | 30                    | 25                             | 24                     | 170                                      | 99.13       | 86.21       | 85.46       |
| 15 | n-Pentanol   | 138.0             | -78.2             | 13.9                | 6.00                               | 3.31                          | 25.60                                   | 44.51                                         | 2.98                                                      | 0.8144                          | 30                    | 25                             | 24                     | 180                                      | 99.26       | 85.37       | 84.74       |
| 15 | n-Pentanol   | 138.0             | -78.2             | 13.9                | 6.00                               | 3.31                          | 25.60                                   | 44.51                                         | 2.98                                                      | 0.8144                          | 30                    | 25                             | 24                     | 190                                      | 99.38       | 84.54       | 84.02       |
| 15 | n-Pentanol   | 138.0             | -78.2             | 13.9                | 6.00                               | 3.31                          | 25.60                                   | 44.51                                         | 2.98                                                      | 0.8144                          | 30                    | 25                             | 24                     | 200                                      | 99.51       | 83.70       | 83.30       |
